# Supplementary material for: Impact of metal crystallinity-related morphologies on the sensing performance of plasmonic nanohole arrays
Source: Royal Society of Chemistry journal article supplement (doi:10.1039/d0nr00619j), 2020-01-01
Supplement: d0nr00619j1.pdf [file d0nr00619j1.pdf]

## Impact of Metal Crystallinity-related Morphologies on the Sensing Performance of Plasmonic Nanohole Arrays

Mansoor Ali Khan,<sup>a</sup> Ying Zhu,<sup>\*a</sup> Yin Yao,<sup>b</sup> Pengfei Zhang,<sup>c</sup> Arti Agrawal,<sup>d</sup> and Peter Reece,<sup>\*e</sup>

<sup>a</sup> St George and Sutherland Clinical School, UNSW Sydney, NSW 2052 Australia

<sup>b</sup> Electron Microscope Unit, UNSW Sydney, NSW 2052 Australia

<sup>c</sup> School of Photovoltaic and Renewable Energy Engineering, UNSW Sydney, NSW 2052 Australia

<sup>d</sup> School of Electrical and Data Engineering, University of Technology Sydney, NSW 2007, Australia

<sup>e</sup> School of Physics, UNSW Sydney, NSW 2052 Australia

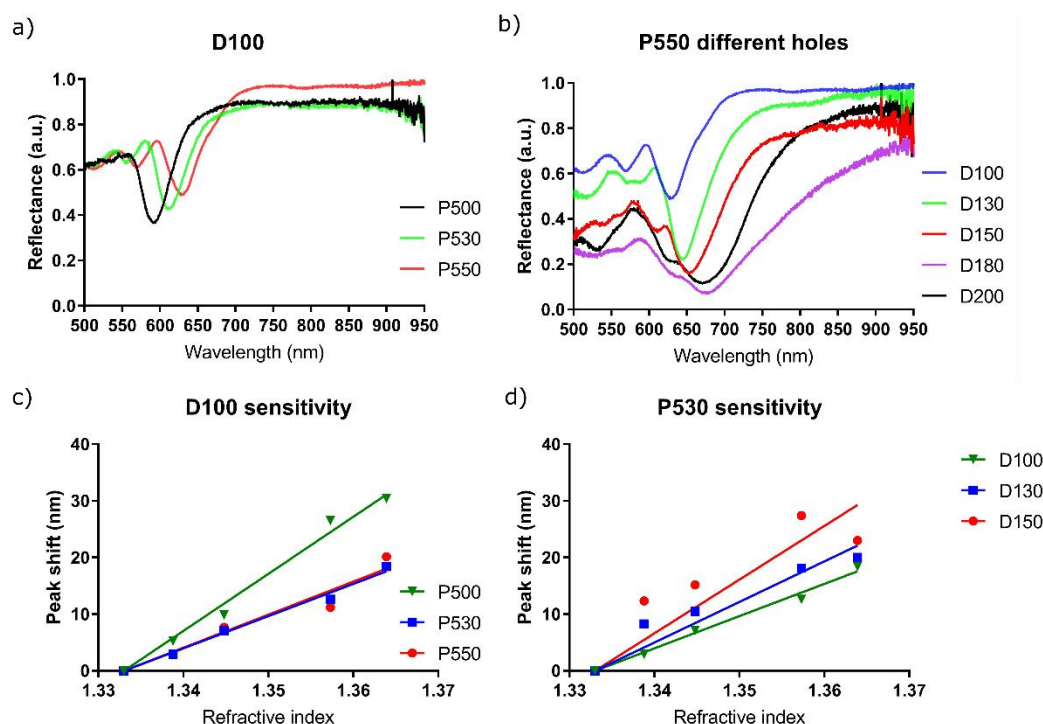

Fig. S1 The influence of hole size and periodicity to the optical reflectance spectrum and sensitivity. a, c) The influence of periodicity to the spectrum and sensitivity with a certain hole size; b, d) The influence of hole size to the spectrum and sensitivity with a certain periodicity. (Dxxx: diameter xxx nm in EBL design; Pxxx: hole centre-to-centre distance xxx nm).

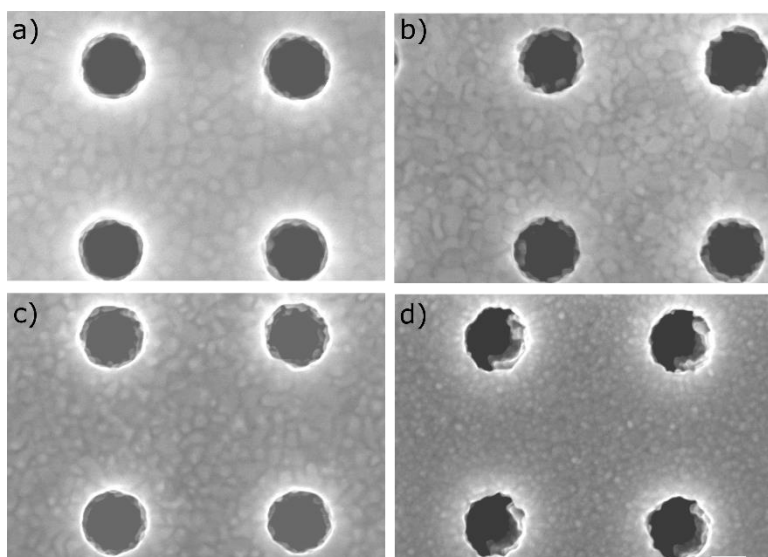

Fig. S2 SEM images of nanohole arrays showing side depositions on the inside walls of the nanoholes from all deposition methods. a) E-beam 0.5 Å/sec, b) E-beam 4 Å/sec, c) Lesker thermal 4 Å/sec, d) Edward thermal 4 Å/sec. Scale bar for all figures is shown in d): 100 nm. The brightness of the images was enhanced to show the inside walls clearly.

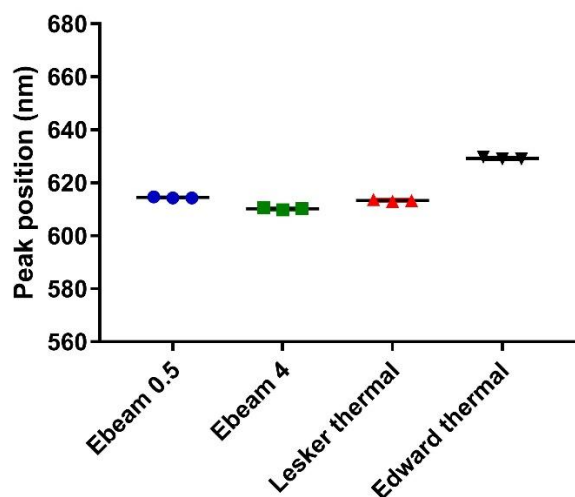

Fig. S3 Peak positions from each sample with three replicates. Edward thermal provided a larger peak position 629.2 nm in average, while the other three methods provided similar peak position (614.5 nm, 610.2 nm and 613.4 nm in average for Ebeam 0.5, Ebeam 4, and Lesker thermal respectively).

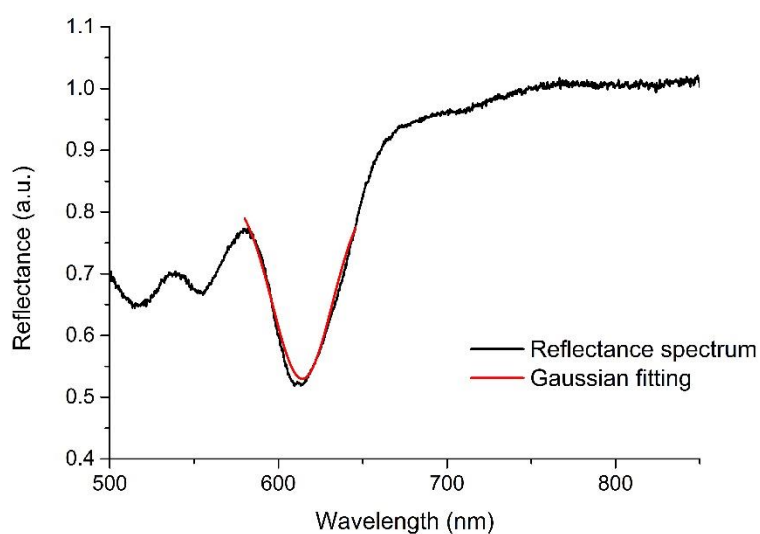

Fig. S4 The calculation of the full width at half maximum (FWHM) of the resonance peak in reflectance spectra. The (-1, 0) mode was fitted by Gaussian function using OriginPro 9, and the FWHM was provided by the software.

Table S1. Experimental parameters for all the metal deposition techniques

| Method name    | Equipment               | Ti deposition rate (Å/sec) | Au deposition rate (Å/sec) | Base Pressure (Torr)                            |
|----------------|-------------------------|----------------------------|----------------------------|-------------------------------------------------|
| Ebeam 0.5      | PVD-Ebeam               | 2                          | 0.5                        | $8.70 \times 10^{-7}$                           |
| Ebeam 4        | PVD-Ebeam               | 2                          | 4                          | $2-3 \times 10^{-6}$                            |
| Lesker Thermal | Lesker Thermal          | 1.5 to 2                   | 3.8-4.2                    | $2-5 \times 10^{-6}$                            |
| Edward Thermal | Edwards Auto500 Thermal | 1-2                        | 3.8-4.4                    | $6.5 \times 10^{-6}$<br>to $1.5 \times 10^{-5}$ |
